# Supplementary material
Source: PubMed Central journal article supplement (PMC5710372)

## Supplementary Online Content

Filippidis FT, Lavery AA, Hone T, Been JV, Millett C. Association of cigarette price differentials with infant mortality in 23 European Union countries. *JAMA Pediatr*. Published online September 18, 2017.

doi:10.1001/jamapediatrics.2017.2536

**eTable 1.** Median GDP per Capita, Score of the Smokefree Component of the Tobacco Control Scale, Unemployment, Education, and Births by Mothers at High Risk in NUTS- 2 Regions of 23 EU Countries, 2004-2014

**eTable 2.** Infant Mortality Rate (per 1,000 Live Births) in 23 EU Countries, 2004-2014

**eTable 3.** Minimum Cigarette Prices per Pack In 23 EU Countries, 2004-2014

**eTable 4.** Median Cigarette Prices per Pack in 23 EU Countries, 2004-2014

**eTable 5.** Price Differential Between Median and Minimum Cigarette Prices (% of Median Price) in 23 EU Countries, 2004-2014

**eTable 6.** Sensitivity Analysis: Association of Infant Mortality (Infant Deaths per 1,000 Live Births) With Median Cigarette Price and Price Differential Between Median and Minimum Cigarette Price, in 23 EU Countries (950 Region-Years)

**eFigure 1.** Tax Increases and Minimum and Median Cigarette Prices in the United Kingdom, 2004-2014

**eFigure 2.** Potential Causal Pathways Between Tobacco Prices and Infant Mortality

This supplementary material has been provided by the authors to give readers additional information about their work.

**eTable 1. Median GDP per capita, score of the Smokefree component of the Tobacco Control Scale, unemployment, education, and births by mothers at high risk in NUTS-2 regions of 23 European Union countries, 2004 to 2014.**

|                                                                             | 2004                   | 2005                   | 2006                   | 2007                   | 2008                   | 2009                   | 2010                   | 2011                   | 2012                   | 2013                   | 2014                   |
|-----------------------------------------------------------------------------|------------------------|------------------------|------------------------|------------------------|------------------------|------------------------|------------------------|------------------------|------------------------|------------------------|------------------------|
| <b>Median % of people 25-64 with higher education</b>                       | 22.0<br>(15.4-26.7)    | 22.3<br>(15.4-27.4)    | 22.9<br>(16.4-28.1)    | 23.4<br>(16.8-29.1)    | 24.3<br>(17.6-29.6)    | 25.4 (18.-30.4)        | 26.0<br>(19.2-31.5)    | 26.5<br>(19.3-32.2)    | 27.3<br>(20.6-33.2)    | 27.8<br>(21.6-34.8)    | 27.5<br>(21.7-35.1)    |
| <b>Median unemployment (%)</b>                                              | 8.0 (5.3-11.0)         | 7.9 (5.4-10.6)         | 7.3 (5.4-10.0)         | 6.5 (4.8-8.9)          | 6.4 (4.6-8.4)          | 7.9 (6.0-10.4)         | 8.5 (6.3-11.6)         | 8.5 (6.0-12.3)         | 8.6 (6.4-12.2)         | 8.9 (6.6-12.8)         | 8.4 (6.0-11.9)         |
| <b>Median % of all births by mothers aged &lt;18 or ≥40 years</b>           | 4.0 (3.2-4.9)          | 4.2 (3.3-5.2)          | 4.4 (3.2-5.3)          | 4.5 (3.4-5.3)          | 4.7 (3.4-5.5)          | 4.7 (3.5-5.6)          | 4.8 (3.6-5.5)          | 4.8 (3.6-5.7)          | 4.8 (3.8-5.8)          | 4.6 (3.8-6.2)          | 4.7 (3.9-6.4)          |
| <b>Median GDP per capita (€) adjusted for inflation</b>                     | 28422<br>(18156-33595) | 28393<br>(18589-34075) | 29482<br>(18942-35183) | 29822<br>(19484-35830) | 28330<br>(19022-33884) | 25982<br>(18179-31546) | 26309<br>(17723-33158) | 25964<br>(16505-33298) | 26116<br>(16045-32894) | 25866<br>(15481-32365) | 26400<br>(15700-33000) |
| <b>Median score of the Smokefree component of the Tobacco Control Scale</b> | 6 (2-8)                | 6 (2-8)                | 6 (2-12)               | 12 (6-15)              | 13 (11-17)             | 13 (11-17)             | 13 (11-17)             | 13 (11-17)             | 13 (11-17)             | 13 (11-17)             | 13 (11-18)             |

**eTable 2. Infant mortality rate (per 1,000 live births) in 23 European Union countries, 2004 to 2014.**

| Country        | 2004 | 2005 | 2006 | 2007 | 2008 | 2009 | 2010 | 2011 | 2012 | 2013 | 2014 |
|----------------|------|------|------|------|------|------|------|------|------|------|------|
| Belgium        | 3.9  | 3.7  | 4.0  | 3.9  | 3.8  | 3.5  | 3.6  | 3.4  | 3.8  | 3.5  | 3.4  |
| Bulgaria       | 11.6 | 10.4 | 9.7  | 9.2  | 8.6  | 9.0  | 9.4  | 8.5  | 7.8  | 7.3  | 7.6  |
| Czech Republic | 3.7  | 3.4  | 3.3  | 3.1  | 2.8  | 2.9  | 2.7  | 2.7  | 2.6  | 2.5  | 2.4  |
| Denmark        | 4.4  | 4.4  | 3.5  | 4.0  | 4.0  | 3.1  | 3.4  | 3.5  | 3.4  | 3.5  | 4.0  |
| Estonia        | 6.4  | 5.4  | 4.4  | 5.0  | 5.0  | 3.6  | 3.3  | 2.5  | 3.6  | 2.1  | 2.7  |
| Finland        | 3.3  | 3.0  | 2.8  | 2.7  | 2.6  | 2.6  | 2.3  | 2.4  | 2.4  | 1.8  | 2.2  |
| France         | 4.0  | 3.8  | 3.8  | 3.8  | 3.8  | 3.9  | 3.6  | 3.5  | 3.5  | 3.5  | 3.5  |
| Germany        | 4.1  | 3.9  | 3.8  | 3.9  | 3.5  | 3.5  | 3.4  | 3.6  | 3.3  | 3.3  | 3.2  |
| Greece         | 4.1  | 3.8  | 3.7  | 3.5  | 2.7  | 3.1  | 3.8  | 3.4  | 2.9  | 3.7  | 3.8  |
| Hungary        | 6.6  | 6.2  | 5.7  | 5.9  | 5.6  | 5.1  | 5.3  | 4.9  | 4.9  | 5.0  | 4.5  |
| Ireland        | 4.6  | 3.8  | 3.9  | 3.2  | 3.4  | 3.3  | 3.6  | 3.5  | 3.5  | 3.5  | 3.3  |
| Italy          | 3.4  | 3.3  | 3.2  | 3.1  | 3.1  | 3.2  | 3.0  | 2.9  | 2.9  | 2.9  | 2.8  |
| Latvia         | 9.3  | 7.7  | 7.4  | 8.5  | 6.6  | 7.6  | 5.6  | 6.6  | 6.3  | 4.4  | 3.8  |
| Lithuania      | 8.1  | 7.1  | 7.2  | 6.3  | 5.5  | 5.6  | 5.0  | 4.8  | 3.9  | 3.7  | 3.9  |
| Netherlands    | 4.4  | 4.9  | 4.4  | 4.1  | 3.8  | 3.8  | 3.8  | 3.6  | 3.7  | 3.8  | 3.6  |
| Poland         | 6.8  | 6.4  | 6.0  | 6.0  | 5.6  | 5.6  | 5.0  | 4.7  | 4.6  | 4.6  | 4.2  |
| Portugal       | 3.8  | 3.5  | 3.3  | 3.4  | 3.3  | 3.6  | 2.5  | 3.1  | 3.4  | 2.9  | 2.9  |
| Romania        | 16.8 | 15.0 | 13.9 | 12.0 | 11.0 | 10.1 | 9.8  | 9.4  | 9.0  | 9.2  | 8.4  |
| Slovakia       | 6.8  | 7.2  | 6.6  | 6.1  | 5.9  | 5.7  | 5.7  | 4.9  | 5.8  | 5.5  | 5.8  |
| Slovenia       | 3.7  | 4.1  | 3.4  | 2.8  | 2.4  | 2.4  | 2.5  | 2.9  | 1.6  | 2.9  | 1.8  |
| Spain          | 3.9  | 3.7  | 3.5  | 3.4  | 3.3  | 3.2  | 3.2  | 3.1  | 3.1  | 2.7  | 2.8  |
| Sweden         | 3.1  | 2.4  | 2.8  | 2.5  | 2.5  | 2.5  | 2.5  | 2.1  | 2.6  | 2.7  | 2.2  |
| United Kingdom | 5    | 5.1  | 4.9  | 4.7  | 4.6  | 4.5  | 4.2  | 4.2  | 4    | 3.9  | 3.9  |

**eTable 3. Minimum cigarette prices per pack in 23 European Union countries, 2004 to 2014.**

| Country        | 2004 | 2006 | 2007 | 2008 | 2009 | 2010 | 2011 | 2012 | 2013 | 2014 |
|----------------|------|------|------|------|------|------|------|------|------|------|
| Belgium        | 3.8  | 3.6  | n/a  | 3.8  | 4.1  | 4.0  | 4.2  | 4.0  | 4.9  | 4.8  |
| Bulgaria       | 0.4  | 1.2  | 1.0  | 1.0  | 1.1  | 1.1  | 1.3  | 1.2  | 2.1  | 2.1  |
| Czech Republic | 1.1  | 1.3  | 1.0  | 2.1  | 2.1  | 2.4  | 2.6  | 2.5  | 2.3  | 2.4  |
| Denmark        | 3.7  | 3.8  | 3.1  | 3.6  | 3.4  | 3.8  | 4.2  | 4.1  | 4.9  | 5.0  |
| Estonia        | 1.2  | 1.3  | 1.3  | 1.0  | 1.9  | 1.9  | 2.0  | 2.1  | 2.3  | 2.6  |
| Finland        | 3.8  | 3.7  | 3.7  | 3.6  | 3.6  | 4.1  | 4.0  | 4.1  | 4.4  | 4.8  |
| France         | 5.3  | 5.0  | 5.0  | 5.2  | 5.2  | 5.0  | 5.6  | 5.5  | 6.5  | 6.5  |
| Germany        | 1.7  | 1.7  | 3.8  | 4.1  | 3.7  | 4.2  | 4.1  | 4.0  | 4.2  | 4.3  |
| Greece         | 1.2  | 1.7  | 1.9  | 1.9  | 2.0  | 2.0  | 2.4  | 2.2  | 3.0  | 3.3  |
| Hungary        | 2.1  | 1.7  | 1.9  | 1.9  | 1.8  | 2.0  | 1.6  | 1.9  | 2.7  | 2.6  |
| Ireland        | 6.3  | 6.4  | 6.2  | 6.3  | 7.3  | 8.1  | 8.0  | 7.8  | 8.1  | 8.3  |
| Italy          | 3.0  | 3.3  | 3.8  | 3.8  | 3.9  | 3.9  | 4.0  | 4.1  | 4.0  | 4.0  |
| Latvia         | 0.8  | 0.6  | 0.5  | 0.7  | 1.4  | 1.9  | 2.0  | 2.1  | 2.3  | 2.5  |
| Lithuania      | 1.0  | 1.0  | 0.8  | 0.9  | 1.1  | 1.5  | 1.9  | 1.9  | 2.1  | 2.2  |
| Netherlands    | 2.9  | 3.4  | 3.6  | 3.5  | 3.8  | 3.4  | 4.1  | 3.4  | 4.4  | 5.5  |
| Poland         | 0.9  | 1.2  | 1.1  | 1.5  | 1.1  | 2.0  | 1.7  | 2.1  | 2.0  | 2.3  |
| Portugal       | 2.3  | 2.5  | 2.9  | 2.8  | 3.2  | 3.3  | 3.2  | 3.5  | 3.3  | 3.6  |
| Romania        | 0.4  | 1.1  | 1.5  | 1.6  | 1.6  | 2.4  | 2.2  | 2.5  | 2.6  | 2.6  |
| Slovakia       | 1.1  | n/a  | 1.8  | 1.9  | 1.9  | 2.0  | 2.4  | 2.3  | 2.6  | 2.7  |
| Slovenia       | n/a  | 1.5  | 2.1  | 2.0  | 2.0  | 2.3  | 2.5  | 2.6  | 3.1  | 3.2  |
| Spain          | 2.2  | 1.7  | 2.5  | 2.2  | 2.2  | 2.4  | 2.6  | 3.5  | 4.2  | 4.0  |
| Sweden         | 3.7  | 3.8  | 4.3  | 3.8  | 3.7  | 4.1  | 4.3  | 5.0  | 4.9  | 5.2  |
| United Kingdom | 6.1  | 7.2  | 7.8  | 5.6  | 5.3  | 5.3  | 5.8  | 5.6  | 7.9  | 7.9  |

Prices shown in Euros and adjusted for inflation  
n/a: not available

**eTable 4. Median cigarette prices per pack in 23 European Union countries, 2004 to 2014.**

| Country        | 2004 | 2006 | 2007 | 2008 | 2009 | 2010 | 2011 | 2012 | 2013 | 2014 |
|----------------|------|------|------|------|------|------|------|------|------|------|
| Belgium        | 4.4  | 4.3  | n/a  | 4.7  | 4.8  | 4.8  | 5.2  | 4.7  | 5.0  | 5.2  |
| Bulgaria       | 0.9  | 1.6  | 1.5  | 1.3  | 1.4  | 1.4  | 2.0  | 2.3  | 2.3  | 2.4  |
| Czech Republic | 1.9  | 2.0  | 2.1  | 2.5  | 2.6  | 2.8  | 3.0  | 2.8  | 2.8  | 2.8  |
| Denmark        | 4.7  | 4.8  | 4.7  | 4.5  | 4.8  | 5.3  | 5.1  | 5.2  | 5.7  | 5.5  |
| Estonia        | 1.6  | 1.9  | 1.6  | 1.5  | 2.2  | 2.5  | 2.5  | 2.6  | 3.0  | 3.1  |
| Finland        | 4.4  | 4.2  | 4.4  | 4.4  | 4.5  | 5.1  | 4.8  | 4.6  | 4.8  | 5.2  |
| France         | 5.5  | 5.3  | 5.2  | 5.7  | 5.3  | 5.4  | 5.6  | 5.7  | 6.5  | 6.5  |
| Germany        | 4.2  | 5.0  | 5.1  | 5.0  | 4.9  | 5.2  | 5.0  | 5.1  | 5.2  | 5.3  |
| Greece         | 2.7  | 2.7  | 3.2  | 3.2  | 3.2  | 2.8  | 3.7  | 3.9  | 3.5  | 3.7  |
| Hungary        | 2.7  | 2.6  | 2.6  | 2.5  | 2.4  | 2.7  | 2.3  | 2.3  | 3.3  | 3.3  |
| Ireland        | 7.1  | 6.9  | 7.3  | 7.4  | 8.3  | 8.8  | 8.8  | 9.2  | 9.4  | 10.0 |
| Italy          | 3.7  | 4.0  | 3.8  | 4.0  | 4.2  | 4.1  | 4.1  | 4.6  | 4.3  | 4.6  |
| Latvia         | 1.3  | 1.2  | 1.2  | 2.1  | 2.0  | 2.3  | 2.3  | 2.6  | 2.7  | 2.9  |
| Lithuania      | 1.5  | 1.5  | 1.1  | 1.4  | 1.5  | 2.4  | 2.4  | 2.3  | 2.4  | 2.5  |
| Netherlands    | 4.4  | 4.6  | 4.5  | 4.4  | 4.6  | 5.1  | 5.0  | 4.6  | 5.9  | 5.9  |
| Poland         | 1.4  | 1.8  | 1.8  | 2.1  | 2.0  | 2.4  | 2.4  | 2.6  | 2.8  | 3.1  |
| Portugal       | 2.5  | 2.9  | 3.1  | 3.2  | 3.6  | 3.7  | 3.7  | 3.8  | 4.0  | 4.1  |
| Romania        | 1.2  | 1.5  | 1.9  | 1.9  | 2.0  | 2.7  | 2.8  | 3.0  | 3.0  | 3.2  |
| Slovakia       | 1.6  | n/a  | 2.2  | 2.5  | 2.6  | 3.0  | 2.7  | 2.8  | 2.9  | 3.1  |
| Slovenia       | n/a  | 2.3  | 2.5  | 2.4  | 2.4  | 2.6  | 2.7  | 2.9  | 3.2  | 3.4  |
| Spain          | 2.7  | 2.4  | 2.7  | 2.7  | 2.7  | 3.2  | 3.9  | 3.9  | 4.4  | 4.5  |
| Sweden         | 4.9  | 4.9  | 5.3  | 5.1  | 4.5  | 5.2  | 5.7  | 6.0  | 6.7  | 6.5  |
| United Kingdom | 8.1  | 8.6  | 9.1  | 7.9  | 6.8  | 7.9  | 8.0  | 8.4  | 9.3  | 9.7  |

Prices shown in Euros and adjusted for inflation  
n/a: not available

**eTable 5. Price differential between median and minimum cigarette prices (% of median price) in 23 European Union countries, 2004 to 2014.**

| Country        | 2004 | 2006 | 2007 | 2008 | 2009 | 2010 | 2011 | 2012 | 2013 | 2014 |
|----------------|------|------|------|------|------|------|------|------|------|------|
| Belgium        | 13.5 | 17.1 | n/a  | 18.9 | 13.7 | 15.4 | 18.3 | 15.9 | 3.3  | 7.7  |
| Bulgaria       | 54.2 | 26.1 | 35.6 | 26.1 | 23.1 | 23.1 | 35.9 | 50.0 | 8.7  | 12.8 |
| Czech Republic | 41.8 | 34.7 | 50.0 | 15.8 | 21.9 | 13.8 | 13.0 | 11.8 | 20.2 | 14.1 |
| Denmark        | 22.0 | 21.0 | 34.1 | 21.0 | 28.8 | 27.0 | 18.9 | 21.1 | 13.1 | 9.8  |
| Estonia        | 24.1 | 33.5 | 18.4 | 31.7 | 16.7 | 23.5 | 21.9 | 19.6 | 23.3 | 16.1 |
| Finland        | 12.1 | 10.2 | 14.9 | 20.0 | 20.2 | 18.2 | 16.6 | 9.3  | 9.3  | 7.9  |
| France         | 5.0  | 6.4  | 4.3  | 9.4  | 2.0  | 7.6  | 0.1  | 3.6  | 0.5  | 0.5  |
| Germany        | 58.4 | 66.3 | 26.5 | 17.9 | 25.2 | 20.0 | 18.2 | 21.9 | 18.4 | 19.0 |
| Greece         | 53.7 | 34.8 | 39.3 | 40.0 | 38.3 | 25.9 | 35.1 | 42.5 | 14.3 | 10.8 |
| Hungary        | 19.8 | 35.7 | 29.0 | 25.5 | 25.5 | 26.2 | 30.7 | 15.6 | 18.1 | 21.8 |
| Ireland        | 10.5 | 7.0  | 14.6 | 15.0 | 11.9 | 8.3  | 9.4  | 14.8 | 13.8 | 16.8 |
| Italy          | 16.7 | 17.6 | 0.0  | 5.6  | 5.3  | 5.3  | 2.6  | 11.1 | 7.0  | 13.0 |
| Latvia         | 36.5 | 51.7 | 55.4 | 68.9 | 29.2 | 20.1 | 14.0 | 18.0 | 15.8 | 14.0 |
| Lithuania      | 34.3 | 33.3 | 29.7 | 36.3 | 25.2 | 37.1 | 20.6 | 17.5 | 12.9 | 11.6 |
| Netherlands    | 33.3 | 25.0 | 21.1 | 21.1 | 18.1 | 32.3 | 17.4 | 26.4 | 26.1 | 7.2  |
| Poland         | 34.0 | 32.7 | 35.6 | 30.5 | 43.7 | 14.5 | 29.3 | 18.5 | 31.1 | 25.4 |
| Portugal       | 7.1  | 11.8 | 8.0  | 13.3 | 10.6 | 11.4 | 12.5 | 9.2  | 17.5 | 12.2 |
| Romania        | 65.5 | 25.9 | 19.6 | 15.4 | 20.0 | 10.1 | 19.6 | 13.9 | 13.1 | 17.1 |
| Slovakia       | 30.2 | n/a  | 19.2 | 25.0 | 26.3 | 34.2 | 10.9 | 15.4 | 11.8 | 11.6 |
| Slovenia       | n/a  | 32.6 | 14.1 | 15.9 | 15.9 | 10.4 | 7.7  | 10.7 | 3.1  | 5.9  |
| Spain          | 18.6 | 28.4 | 8.3  | 20.0 | 18.0 | 26.7 | 33.9 | 9.1  | 5.6  | 12.7 |
| Sweden         | 23.4 | 22.0 | 18.2 | 24.7 | 17.6 | 21.7 | 24.0 | 16.3 | 26.9 | 19.6 |
| United Kingdom | 25.0 | 16.1 | 14.3 | 29.2 | 22.2 | 32.7 | 27.7 | 33.7 | 15.4 | 18.6 |

n/a: not available

**eTable 6. Sensitivity analysis: association of infant mortality (infant deaths per 1,000 live births) with median cigarette price and price differential between median and minimum cigarette price, in 23 European Union countries (950 region-years).**

|                                                                                                                                | $\beta$      | 95% CI                |
|--------------------------------------------------------------------------------------------------------------------------------|--------------|-----------------------|
| Median cigarette price (per pack)                                                                                              |              |                       |
| Within year                                                                                                                    | <b>-0.41</b> | <b>-0.72 to -0.10</b> |
| One year lagged                                                                                                                | -0.06        | -0.37 to 0.24         |
| Price differential between median and minimum cigarette price (per 10% increase)                                               |              |                       |
| Within year                                                                                                                    | 0.01         | -0.06 to 0.09         |
| One year lagged                                                                                                                | <b>0.16</b>  | <b>0.05 to 0.26</b>   |
| GDP per capita (per €1,000)                                                                                                    | 0.06         | 0.00 to 0.11          |
| Comprehensive Smoke-free component of the legislation (Tobacco Control Scale (per point increase smoke-free score $\geq 18$ )) | 0.23         | -0.11 to 0.58         |
| Unemployment (per 10%)                                                                                                         | -0.01        | -0.25 to 0.22         |
| Education (per % of people 25-64 with higher education)                                                                        | -0.02        | -0.08 to 0.04         |
| Births by mothers at higher risk (% of all births by mothers aged <18 or $\geq 40$ years)                                      | <b>0.30</b>  | <b>0.13 to 0.47</b>   |
| Time (per calendar year)                                                                                                       |              |                       |
| Linear term                                                                                                                    | <b>-0.38</b> | <b>-0.55 to -0.21</b> |
| Quadratic term                                                                                                                 | <b>0.02</b>  | <b>0.01 to 0.03</b>   |

Only data from years for which original (i.e. non-interpolated) TCS scores were available were used: 2005, 2007, 2010 and 2013.

eFigure 1. Tax increases, minimum and median cigarette prices in the United Kingdom, 2004-2014.

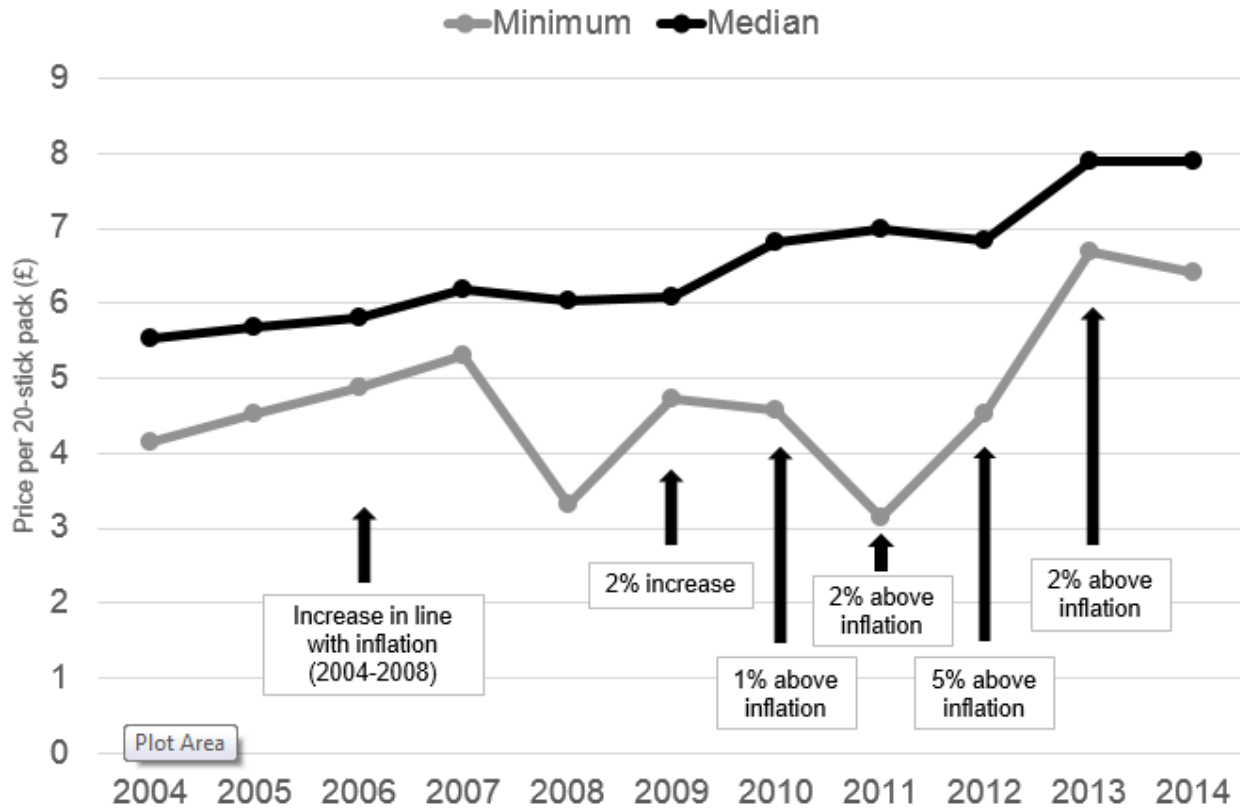

Prices are adjusted for inflation.



eFigure 2. Potential causal pathways between tobacco prices and infant mortality.

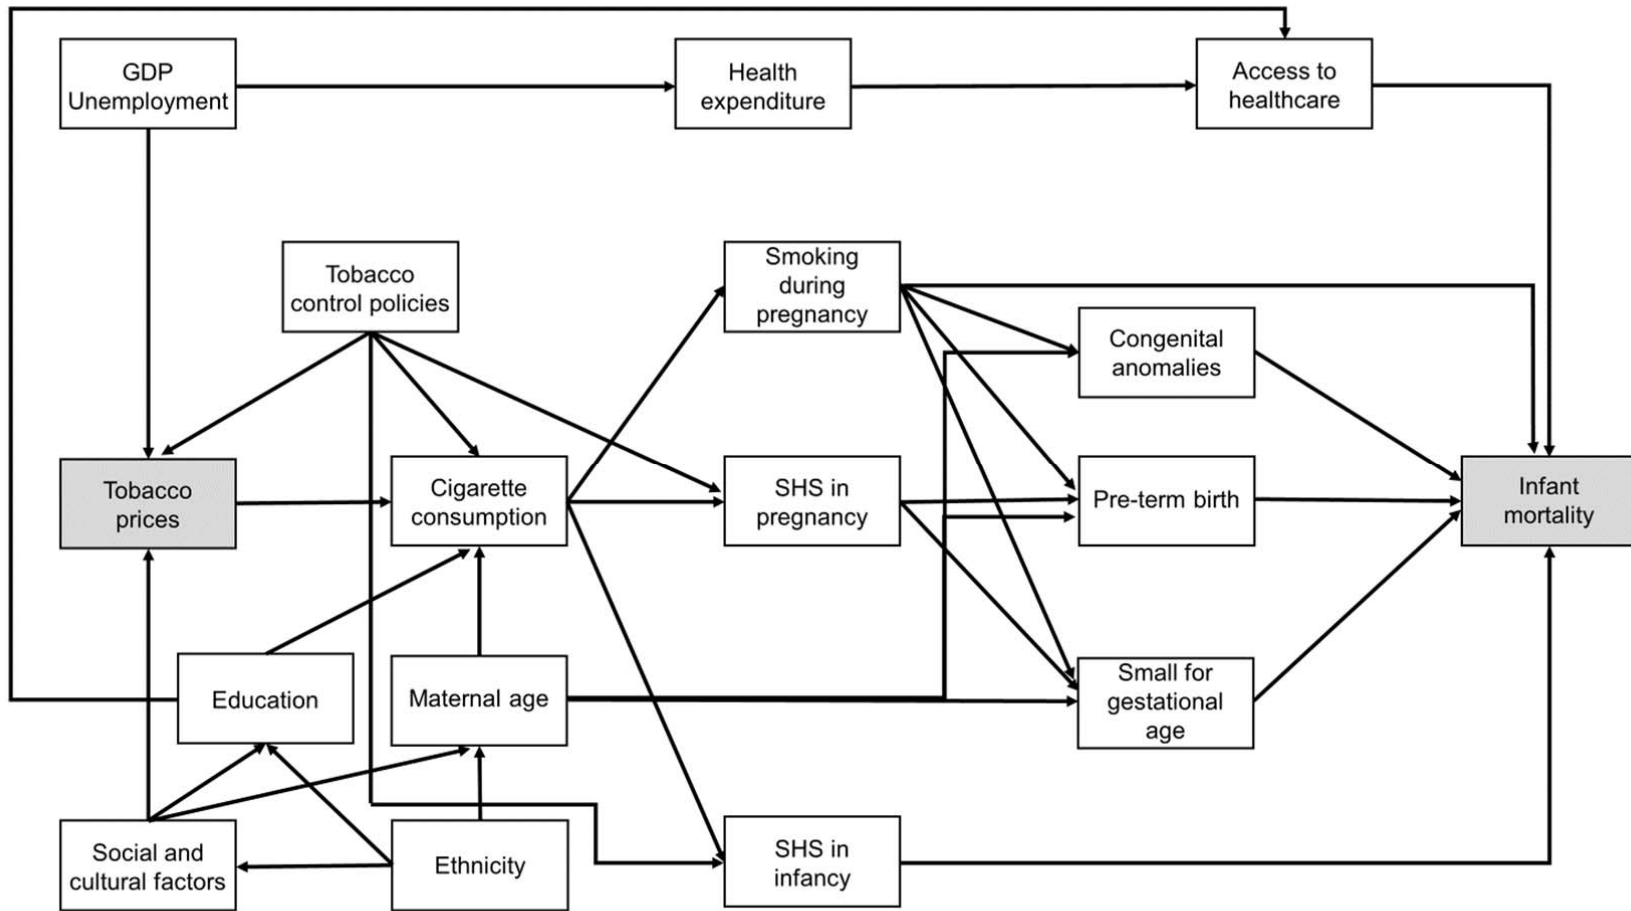

Supplement: jamapediatr-171-1100-s001.pdf [file jamapediatr-171-1100-s001.pdf]
